# Supplementary material for: Role of Plasticizers on PHB/bio-TPE Blends Compatibilized by Reactive Extrusion
Source: MDPI journal article supplement (doi:10.3390/ma15031226), 2022-02-07

Supplementary Materials.

# Role of plasticizers on PHB/bio-TPE blends compatibilized by reactive extrusion.

Kerly Samaniego<sup>1</sup>, Armando Matos<sup>1</sup>, Estefanía Sánchez-Safont<sup>1</sup>, María V. Candal<sup>2</sup>, Jose M. Lagaron<sup>3</sup>, Luis Cabedo<sup>1</sup> and Jose Gamez-Perez<sup>1,\*</sup>.

<sup>1</sup> Polymers and Advanced Materials Group (PIMA), Universitat Jaume I, 12071 Castelló de la Plana, Spain; samanieg@uji.es (K.S.); amatos@uji.es (A.M.); esafont@uji.es (E.S.-S.); lcabedo@uji.es (L.C.)

<sup>2</sup> Technology and Science Group, Valencian International University (VIU), 46002 Valencia, Spain; mariavirginiacandal@campusviu.es

<sup>3</sup> Novel Materials and Nanotechnology Group, Institute of Agrochemistry and Food Technology (IATA), Spanish National Research Council (CSIC), 46980 Valencia, Spain; lagaron@iata.csic.es \* Correspondence: gamez@uji.es

**Figure S1. DSC Curves.**

(A) PHB/TPE 15%

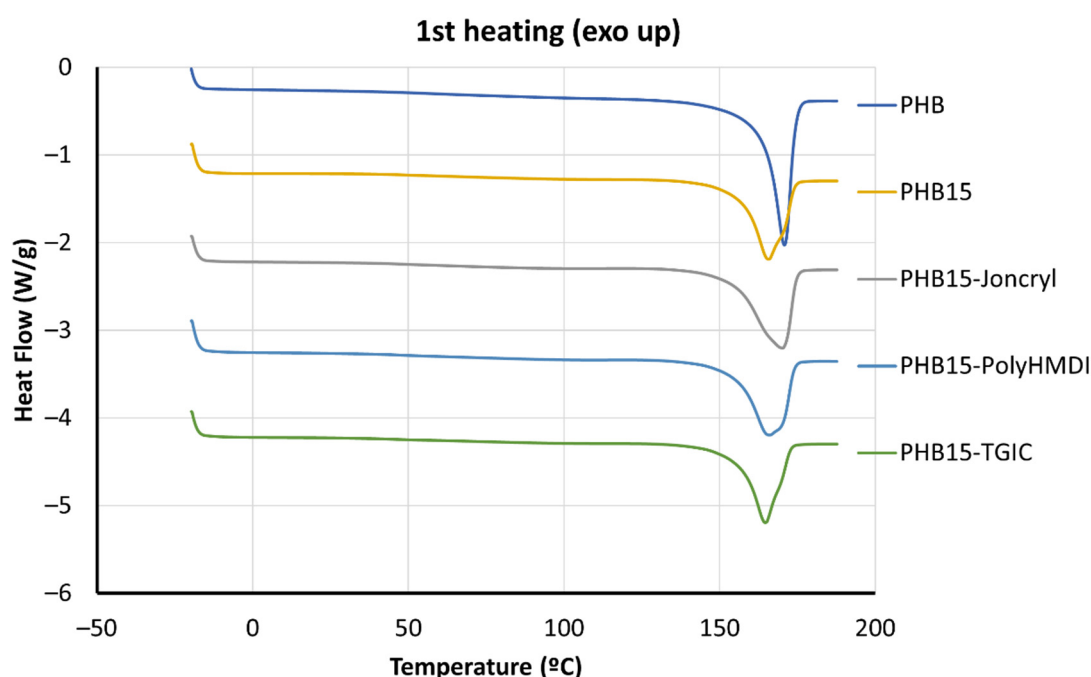

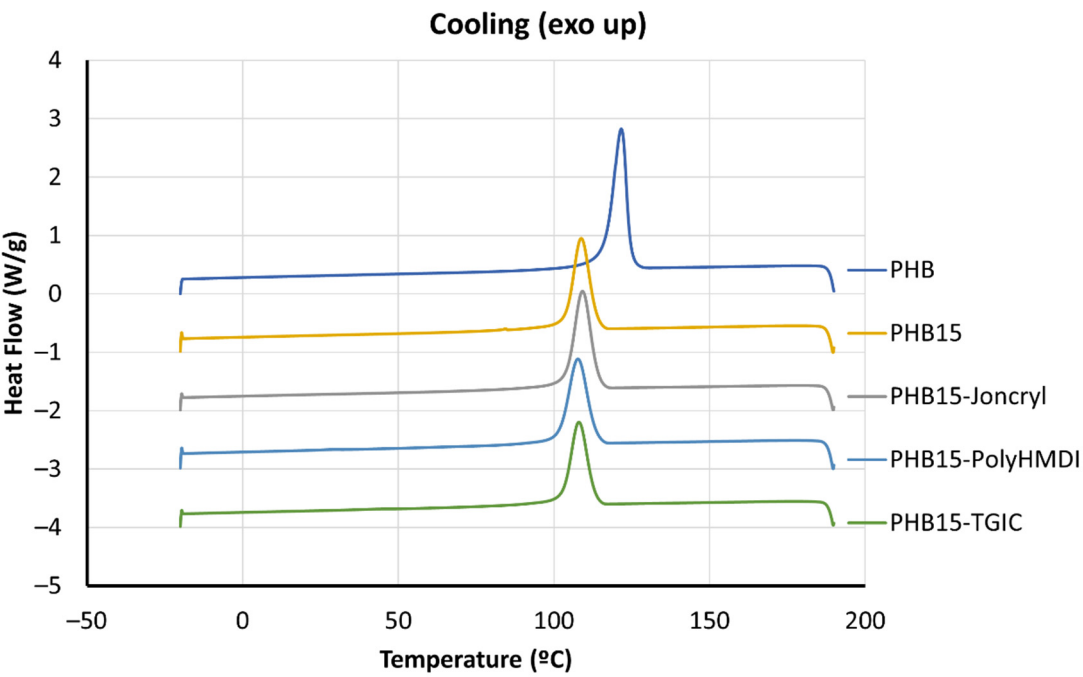

19

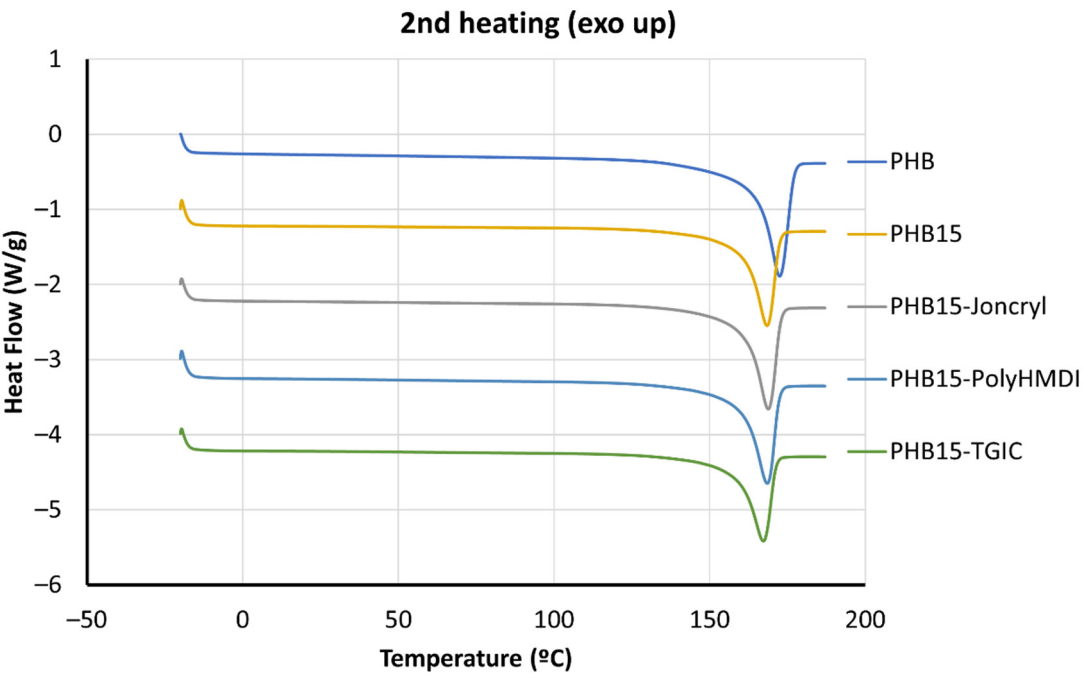

20  
21  
22

(B) PHB/TPE 30%

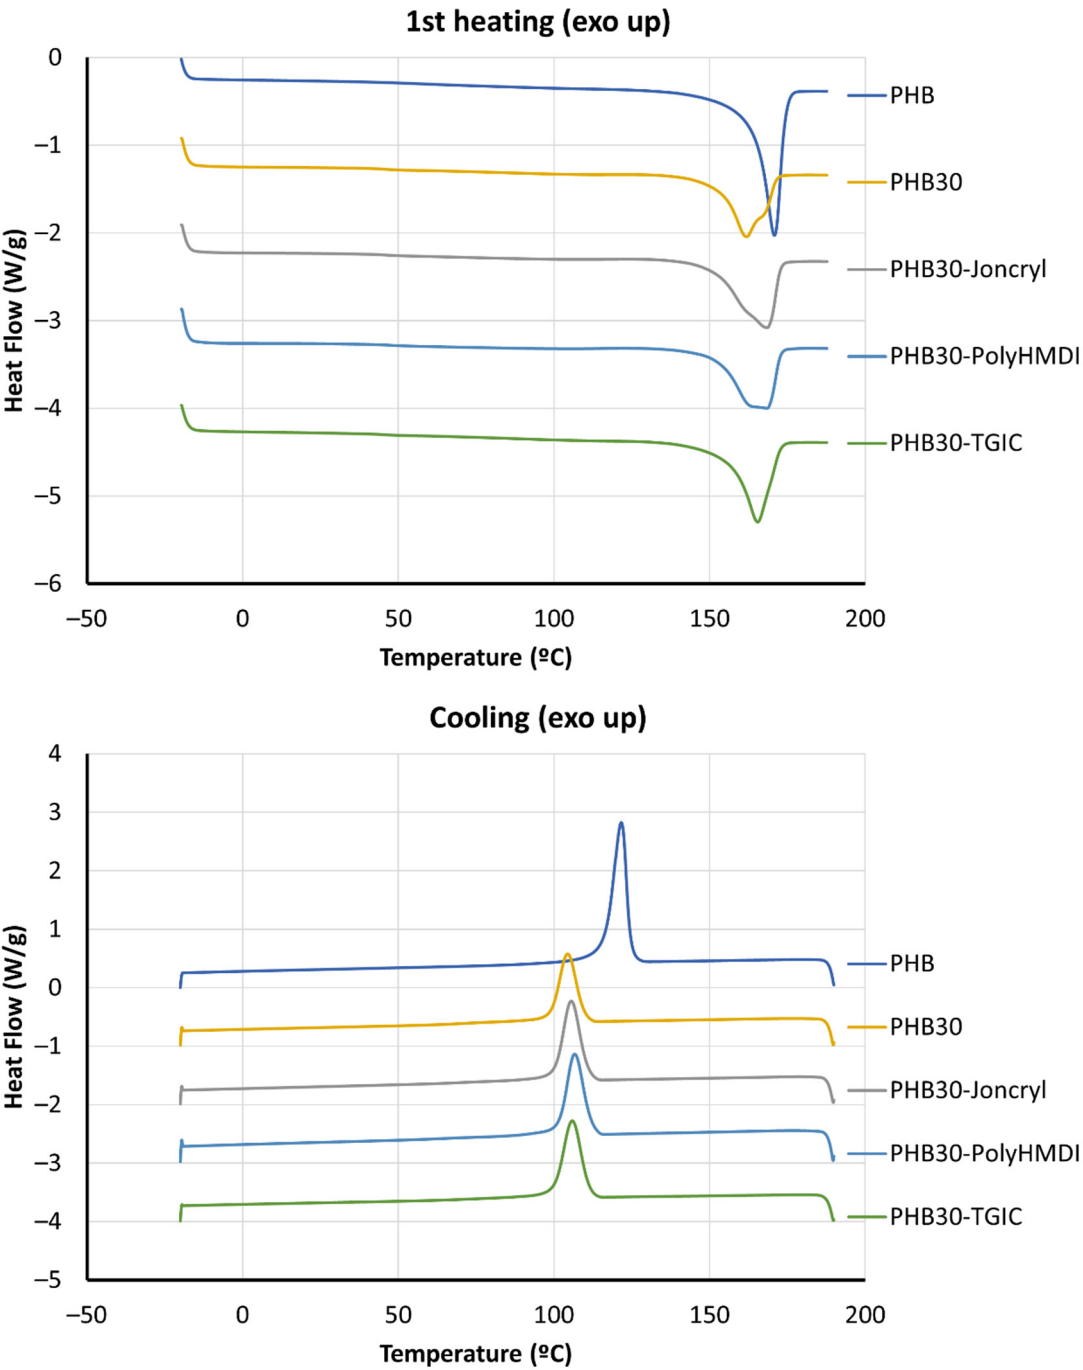

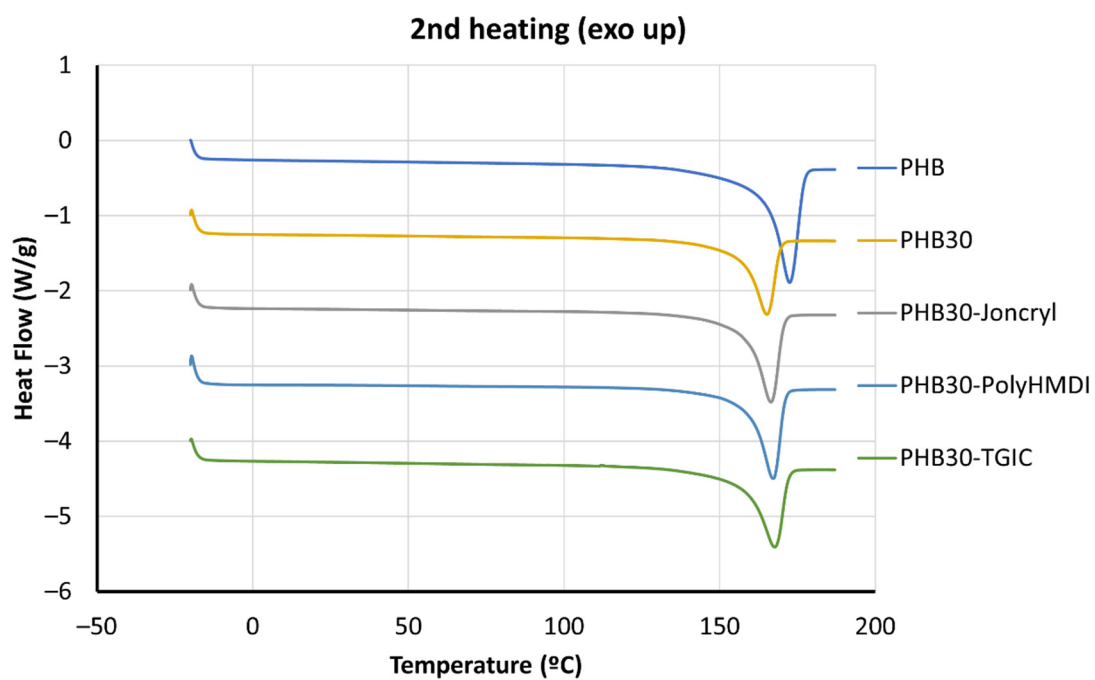

Figure S2. TGA/FTIR Curves TPE

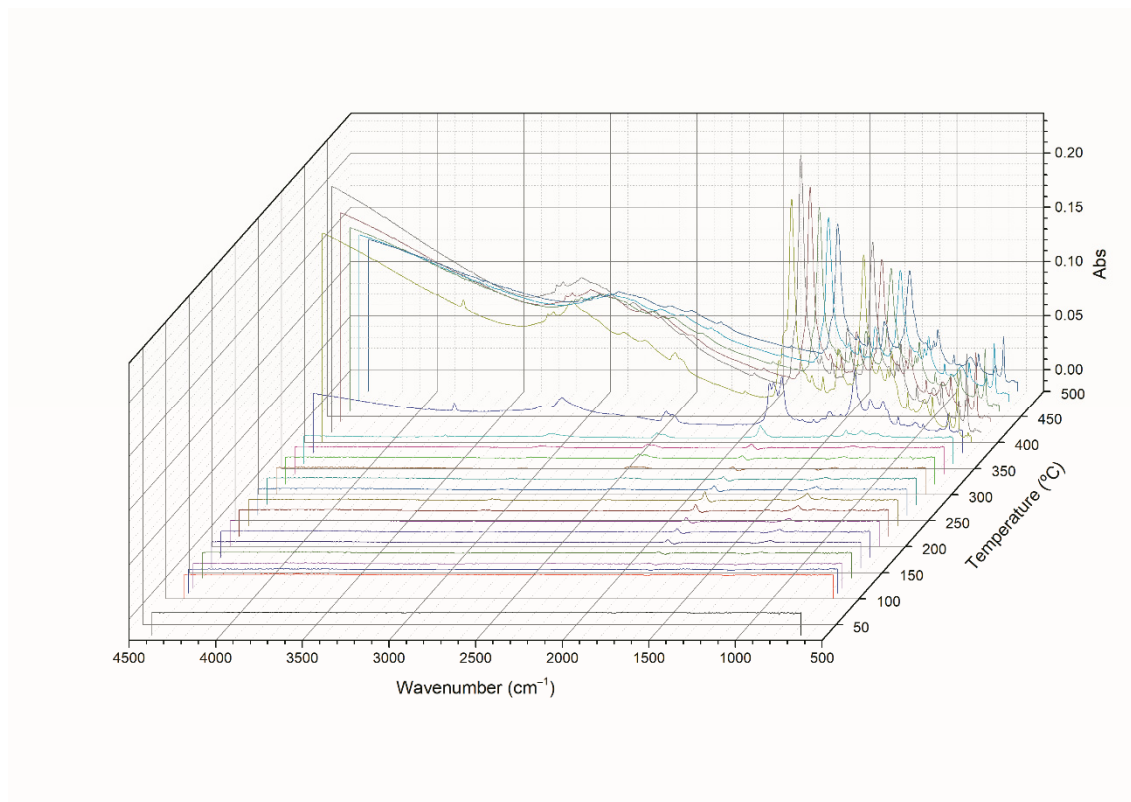

Supplement: s1 [file s1]
